# Supplementary figures and images for: Melatonin Treatments Reduce Chilling Injury and Delay Ripening, Leading to Maintenance of Quality in Cherimoya Fruit
Source: MDPI journal article supplement (doi:10.3390/ijms24043787), 2023-02-14

Supplementary Materials

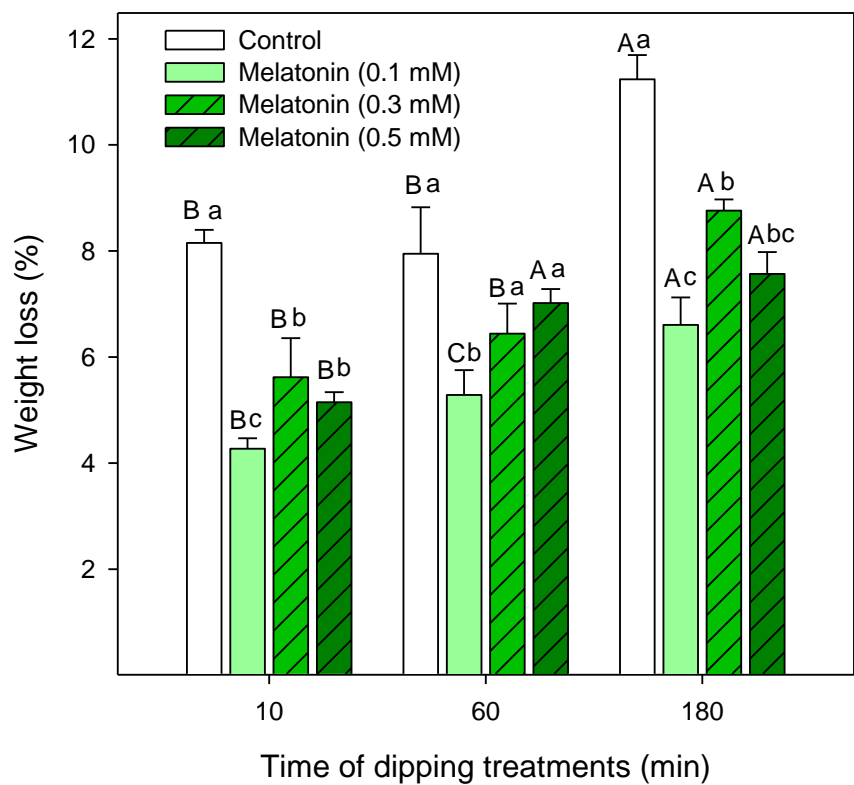

Figure S1

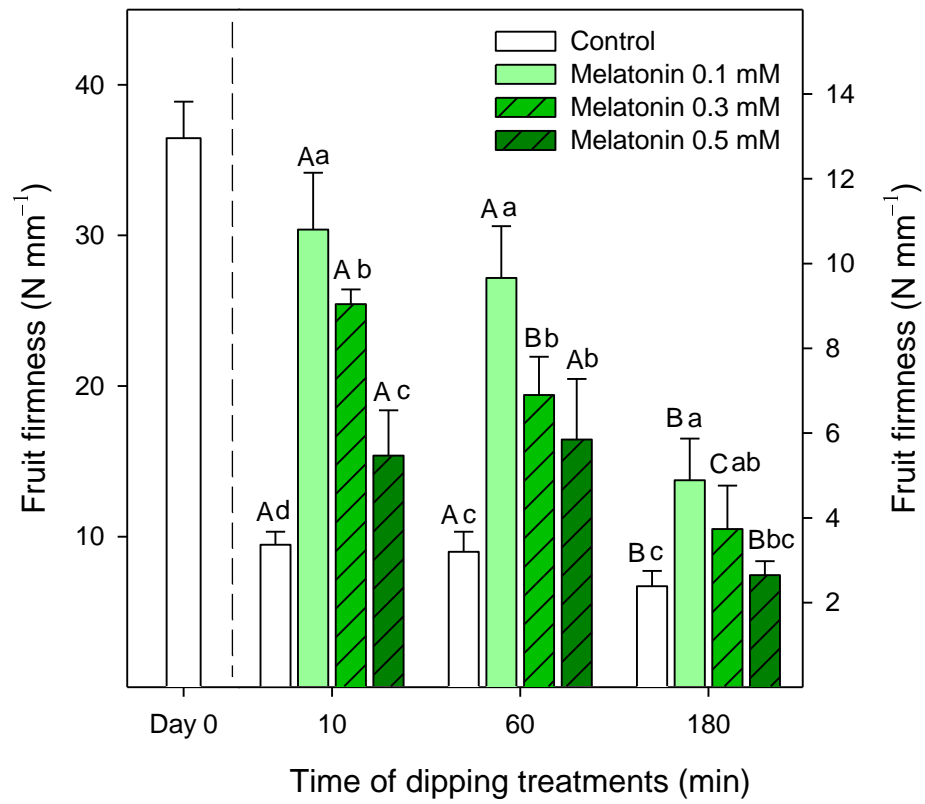

Figure S2

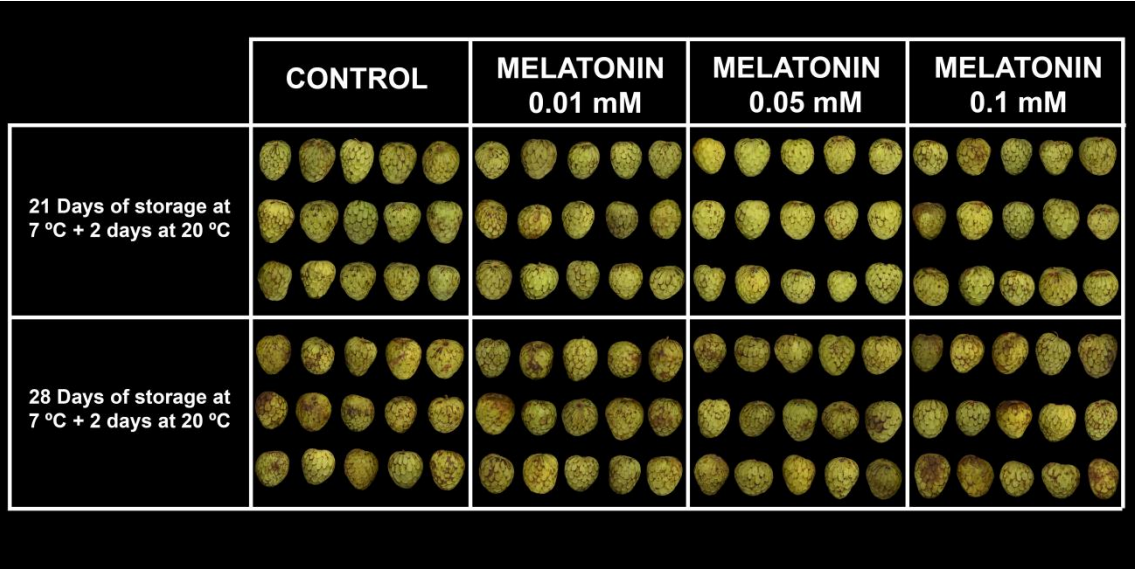

Figure S3

Supplement: s1 [file s1]
